# Supplementary material
Source: HighWire-hosted journal article supplement (https://erj.ersjournals.com/content/61/1/2200611)
Supplement: inline-supplementary-material-1 [file inline-supplementary-material-1.pdf]

Online supplement for:

Clinical outcomes of bronchiectasis in India; Data from the EMBARC/Respiratory Research Network of India registry

Raja Dhar<sup>1</sup>, Sheetu Singh<sup>2</sup>, Deepak Talwar<sup>3</sup>, Murali Mohan BV<sup>4</sup>, Surya Kant Tripathi<sup>5</sup>, Rajesh Swarnakar<sup>6</sup>, Sonali Trivedi<sup>7</sup>, Srinivas Rajagopala<sup>8</sup>, George D'Souza<sup>9</sup>, Arjun Padmanabhan<sup>10</sup>, B Archana<sup>11</sup>, Mahesh PA<sup>12</sup>, Babaji Ghewade<sup>13</sup>, Girija Nair<sup>14</sup>, Aditya Jindal<sup>15</sup>, Gayathri Devi H Jayadevappa<sup>16</sup>, Honney Sawhney<sup>17</sup>, Kripesh Ranjan Sarmah<sup>18</sup>, Kaushik Saha<sup>19</sup>, Suresh Anantharaj<sup>20</sup>, Arjun Khanna<sup>21</sup>, Samir Gami<sup>22</sup>, Arti Shah<sup>23</sup>, Arpan Shah<sup>24</sup>, Naveen Dutt<sup>25</sup>, Himanshu Garg<sup>26</sup>, Sunil Vyas<sup>27</sup>, Kummannoor Venugopal<sup>28</sup>, Rajendra Prasad<sup>29</sup>, Naveed M Aleemuddin<sup>30</sup>, Saurabh Karmakar<sup>31</sup>, Virendra Singh<sup>32</sup>, SK Jindal<sup>15</sup>, Shubham Sharma<sup>1</sup>, Deepak Prajapat<sup>3</sup>, Sagar Chandrashekar<sup>4</sup>, Michael Loebinger<sup>33</sup>, Aditi Mishra<sup>6</sup>, Francesco Blasi<sup>34</sup>, Ramanathan Palaniappan Ramanathan<sup>8</sup>, Pieter C Goeminne<sup>35</sup>, Preethi Vasudev<sup>10</sup>, Amelia Shoemark<sup>36</sup>, BS Jayaraj<sup>12</sup>, Rahul Kungwani<sup>13</sup>, Akanksha Das<sup>14</sup>, Mehneet Sawhney<sup>17</sup>, Eva Polverino<sup>37</sup>, Tobias Welte<sup>38</sup>, Nayan Sri Gulecha<sup>20</sup>, Michal Shteinberg<sup>39</sup>, , Anshul Mangala<sup>23</sup>, Palak Shah<sup>24</sup>, Nishant Kumar Chauhan<sup>25</sup>, Nikita Jajodia<sup>26</sup>, Ashutosh Singhal<sup>27</sup>, Sakshi Batra<sup>29</sup>, Ashfaq Hasan<sup>30</sup>, Stefano Aliberti<sup>40</sup>, Megan L Crichton<sup>36</sup>, Sneha Limaye<sup>41</sup>, Sundeep Salvi<sup>41</sup> James D Chalmers<sup>36</sup>.

The EMBARC India study group

ONLINE SUPPLEMENTARY MATERIAL

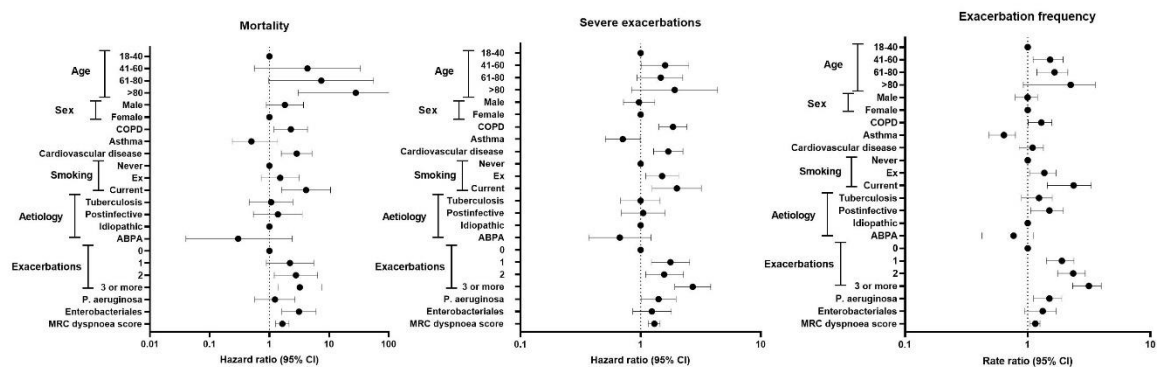

Figure S1. Multivariable models of outcomes (full data presented in table 4).

| Characteristics        | Mortality        | Hospitalization  | Exacerbations    |
|------------------------|------------------|------------------|------------------|
| <b>Sex</b>             |                  |                  |                  |
| Male                   | 1.26 (0.71-2.24) | 1.18 (0.91-1.52) | 1.22 (1.02-1.46) |
| Female                 | 1.0 (reference)  | 1.0 (reference)  | 1.0 (reference)  |
| <b>Co-morbidities</b>  |                  |                  |                  |
| COPD                   | 1.94 (1.09-3.46) | 1.62 (1.24-2.10) | 1.45 (1.19-1.76) |
| Asthma                 | 0.54 (0.23-1.27) | 0.70 (0.50-0.98) | 0.54 (0.43-0.68) |
| Cardiovascular disease | 2.04 (1.13-3.65) | 1.43 (1.08-1.90) | 0.92 (0.74-1.15) |
| <b>Smoking</b>         |                  |                  |                  |
| Never                  | 1.0 (reference)  | 1.0 (reference)  | 1.0 (reference)  |
| Ex                     | 1.0 (0.53-1.87)  | 1.34 (1.01-1.77) | 1.47 (1.20-1.79) |
| Current                | 2.17 (0.94-5.02) | 1.80 (1.16-2.78) | 2.39 (1.68-3.40) |
| <b>Aetiology</b>       |                  |                  |                  |
| Tuberculosis           | 0.74 (0.33-1.64) | 1.02 (0.71-1.46) | 1.72 (1.33-2.22) |
| Postinfective          | 0.85 (0.35-2.10) | 0.99 (0.66-1.49) | 1.74 (1.31-2.31) |
| Idiopathic             | 1.0 (reference)  | 1.0 (reference)  | 1.0 (reference)  |
| ABPA                   | 0.21 (0.03-1.63) | 0.62 (0.35-1.12) | 0.60 (0.40-0.91) |

Table S2. Multivariable models adjusted for BSI only (only including variables not included in the BSI)

| <b>Patient characteristics</b>       | <b>Age &lt;40</b> | <b>40-60</b>     | <b>≥60</b>       |
|--------------------------------------|-------------------|------------------|------------------|
| N                                    | 192               | 382              | 444              |
| Age (median-IQR)                     | 31 (25-35)        | 51 (46-55)       | 67 (63-71)       |
| Sex (% female)                       | 109 (56.8%)       | 194 (50.8%)      | 163 (36.7%)      |
| <b>Co-morbidities</b>                |                   |                  |                  |
| Cardiovascular diseases              | 8 (4.2%)          | 57 (14.9%)       | 123 (27.7%)      |
| Liver disease                        | 0 (0%)            | 2 (0.5%)         | 11 (2.5%)        |
| Osteoporosis                         | 0 (0%)            | 30 (7.9%)        | 52 (11.7%)       |
| Depression                           | 3 (1.6%)          | 16 (4.2%)        | 19 (4.3%)        |
| Anxiety                              | 6 (3.1%)          | 26 (6.8%)        | 36 (8.1%)        |
| Neoplastic disease                   | 0 (0%)            | 5 (1.3%)         | 3 (0.7%)         |
| Diabetes                             | 4 (2.1%)          | 58 (15.2%)       | 83 (18.7%)       |
| Asthma                               | 63 (32.8%)        | 96 (25.1%)       | 75 (16.9%)       |
| COPD                                 | 8 (4.2%)          | 80 (20.9%)       | 169 (38.1%)      |
| <b>Smoking</b>                       |                   |                  |                  |
| Never                                | 178 (92.7%)       | 288 (75.4%)      | 263 (59.2%)      |
| Ex                                   | 13 (6.8%)         | 69 (18.1%)       | 159 (35.8%)      |
| Current                              | 1 (0.5%)          | 25 (6.5%)        | 22 (5.0%)        |
| BSI (median-IQR)                     | 4 (2-8)           | 6 (4-9)          | 8 (5-11)         |
| Mild                                 | 103 (53.6%)       | 143 (37.4%)      | 84 (18.9%)       |
| Moderate                             | 56 (29.2%)        | 120 (31.4%)      | 152 (34.2%)      |
| Severe                               | 33 (17.2%)        | 119 (31.2%)      | 208 (46.8%)      |
| FACED                                | 1 (1-3)           | 2 (1-3)          | 3 (1-4)          |
| Mild                                 | 126 (65.6%)       | 220 (57.6%)      | 203 (45.7%)      |
| Moderate                             | 62 (32.3%)        | 146 (38.2%)      | 180 (40.5%)      |
| Severe                               | 4 (2.1%)          | 16 (4.2%)        | 61 (13.7%)       |
| FEV <sub>1</sub> % predicted         | 52.0 (34.2-65.9)  | 48.4 (32.3-65.1) | 50.4 (33.3-67.3) |
| BMI (median-IQR)                     | 20.3 (17.2-23.4)  | 22.0 (19.4-25.3) | 22.0 (19.3-24.4) |
| MRC dyspnoea score (median-IQR)      | 1 (0-2)           | 1 (1-3)          | 2 (1-3)          |
| Sputum volume (daily)                | 10 (0-20)         | 18 (0-30)        | 10 (0-25)        |
| Exacerbations per year (median, IQR) | 1 (0-2)           | 1 (0-2)          | 1 (0-2)          |
| 0                                    | 88 (45.8%)        | 161 (42.1%)      | 145 (32.7%)      |
| 1                                    | 36 (18.8%)        | 77 (20.2%)       | 92 (20.7%)       |

|                                       |             |             |             |
|---------------------------------------|-------------|-------------|-------------|
| 2                                     | 32 (16.7%)  | 86 (22.5%)  | 114 (25.7%) |
| 3 or more                             | 36 (18.8%)  | 58 (15.2%)  | 93 (20.9%)  |
| Hospitalized for severe exacerbations | 51 (26.6%)  | 127 (33.2%) | 195 (43.9%) |
| <b>Bacteriology</b>                   |             |             |             |
| <i>P. aeruginosa</i>                  | 20 (10.4%)  | 45 (11.8%)  | 49 (11.0%)  |
| <i>H. influenzae</i>                  | 1 (0.5%)    | 1 (0.3%)    | 0 (0%)      |
| <i>M. catarrhalis</i>                 | 5 (2.6%)    | 6 (1.6%)    | 6 (1.4%)    |
| <i>S. aureus</i>                      | 3 (1.6%)    | 5 (1.3%)    | 9 (2.0%)    |
| Enterobacterales                      | 18 (9.4%)   | 37 (9.7%)   | 37 (8.3%)   |
| Reiff score (median, IQR)             | 6 (3-8)     | 6 (3-9)     | 4 (2-6)     |
| <b>Co-medications</b>                 |             |             |             |
| ICS                                   | 116 (60.4%) | 243 (63.6%) | 263 (59.2%) |
| Long term macrolide                   | 12 (6.3%)   | 14 (3.7%)   | 13 (2.9%)   |
| Inhaled antibiotic                    | 5 (2.6%)    | 23 (6.0%)   | 14 (3.2%)   |
| Regular airway clearance              | 64 (33.3%)  | 153 (40.1%) | 177 (39.9%) |
| <b>Aetiology</b>                      |             |             |             |
| Tuberculosis                          | 46 (24.0%)  | 147 (38.5%) | 181 (40.8%) |
| Postinfective                         | 52 (27.1%)  | 85 (22.3%)  | 79 (17.8%)  |
| Idiopathic                            | 38 (19.8%)  | 56 (14.7%)  | 97 (21.8%)  |
| ABPA                                  | 46 (24.0%)  | 44 (11.5%)  | 25 (5.6%)   |

Table S3. Comparison of patient characteristics according to age groups.

| Patient characteristics | K. pneumoniae | No K.pneumoniae |
|-------------------------|---------------|-----------------|
| N                       | 50            | 968             |
| Age (median-IQR)        | 52 (40-65)    | 57 (44-66)      |
| Sex (% female)          | 16 (32.0%)    | 460 (46.5%)     |
| <b>Co-morbidities</b>   |               |                 |
| Cardiovascular diseases | 11 (22.0%)    | 177 (18.3%)     |
| Liver disease           | 1 (2.0%)      | 12 (1.2%)       |
| Osteoporosis            | 8 (16.0%)     | 74 (7.6%)       |
| Depression              | 5 (10.0%)     | 33 (3.4%)       |
| Anxiety                 | 8 (16.0%)     | 60 (6.2%)       |
| Neoplastic disease      | 1 (2.0%)      | 7 (0.7%)        |
| Diabetes                | 16 (32.0%)    | 129 (13.3%)     |
| Asthma                  | 12 (24.0%)    | 222 (22.9%)     |
| COPD                    | 20 (40.0%)    | 237 (24.5%)     |

|                                       |                  |                  |
|---------------------------------------|------------------|------------------|
| <b>Smoking</b>                        |                  |                  |
| Never                                 | 31 (62.0%)       | 698 (72.1%)      |
| Ex                                    | 13 (26.0%)       | 228 (23.6%)      |
| Current                               | 6 (12.0%)        | 42 (4.3%)        |
| BSI (median-IQR)                      | 10 (6-13)        | 6 (4-10)         |
| Mild                                  | 8 (16.0%)        | 322 (33.3%)      |
| Moderate                              | 14 (28.0%)       | 314 (32.4%)      |
| Severe                                | 28 (56.0%)       | 332 (34.3%)      |
| FACED                                 | 3 (1-4)          | 2 (1-3)          |
| Mild                                  | 21 (42.0%)       | 528 (54.5%)      |
| Moderate                              | 25 (50.0%)       | 363 (37.5%)      |
| Severe                                | 4 (8.0%)         | 77 (8.0%)        |
| FEV <sub>1</sub> % predicted          | 42.8 (28.5-57.2) | 50.4 (33.2-66.5) |
| BMI (median-IQR)                      | 21.1 (18.4-24.6) | 21.8 (18.8-24.5) |
| MRC dyspnoea score (mean-SD)          | 2 (2-3)          | 1 (1-2)          |
| Sputum volume (median-IQR)            | 23 (10-43)       | 10 (0-30)        |
| Quality of life bronchiectasis RSS    | 44.4 (40.0-59.3) | 66.7 (51.9-77.8) |
| Exacerbations per year (median, IQR)  | 2 (0-3)          | 1 (0-2)          |
| 0                                     | 13 (26.0%)       | 381 (39.4%)      |
| 1                                     | 8 (16.0%)        | 197 (20.4%)      |
| 2                                     | 13 (26.0%)       | 219 (22.6%)      |
| 3 or more                             | 16 (32.0%)       | 171 (17.7%)      |
| Hospitalized for severe exacerbations | 33 (66%)         | 340 (35.1%)      |
| <b>Bacteriology</b>                   |                  |                  |
| <i>P. aeruginosa</i>                  | 2 (4.0%)         | 112 (11.6%)      |
| <i>H. influenzae</i>                  | 0 (0%)           | 2 (0.2%)         |
| <i>M. catarrhalis</i>                 | 0 (0%)           | 17 (1.8%)        |
| <i>S. aureus</i>                      | 0 (0%)           | 17 (1.8%)        |
| Enterobacterales                      | 50 (100%)        | 42 (4.3%)        |
| Reiff score (median, IQR)             | 6 (4-9)          | 5 (3-6)          |
| <b>Co-medications</b>                 |                  |                  |
| ICS                                   | 36 (72.0%)       | 586 (60.5%)      |
| Long term macrolide                   | 3 (6.0%)         | 36 (3.7%)        |
| Inhaled antibiotic                    | 6 (12.0%)        | 36 (3.7%)        |

|                          |            |             |
|--------------------------|------------|-------------|
| Regular airway clearance | 27 (54.0%) | 367 (37.9%) |
| <b>Aetiology</b>         |            |             |
| Tuberculosis             | 21 (42.0%) | 353 (36.5%) |
| Postinfective            | 9 (18.0%)  | 207 (21.4%) |
| Idiopathic               | 6 (12.0%)  | 185 (19.1%) |
| ABPA                     | 5 (10.0%)  | 110 (11.4%) |

Table S4. Comparison of K.pneumoniae infected patients vs uninfected patients.

| Characteristics          | Estimate | Lower 95%CI | Upper 95%CI | P-value |
|--------------------------|----------|-------------|-------------|---------|
| Female sex               | -8.0     | -72.4       | 56.4        | 0.81    |
| Age (per year)           | -2.7     | -4.8        | -0.6        | 0.010   |
| FEV1 (per Litre)         | -162.4   | -212.5      | -112.2      | <0.001  |
| Exacerbations 2 or more  | -79.3    | -153.6      | -5.0        | 0.036   |
| Exacerbations 1 per year | -30.8    | -106.4      | 44.8        | 0.42    |
| COPD                     | -83.3    | -156.9      | -9.7        | 0.027   |
| Pseudomonas              | -10.6    | -98.7       | 77.6        | 0.81    |
| Enterobacterales         | 59.2     | -24.4       | 142.9       | 0.17    |
| Inhaled antibiotics      | -39.5    | -162.9      | 84.0        | 0.53    |
| Inhaled corticosteroids  | 55.5     | -5.0        | 115.9       | 0.07    |
| Asthma                   | -20.9    | -109.4      | 67.6        | 0.64    |
| Current smoker           | -12.7    | -135.5      | 110.1       | 0.84    |
| Ex smoker                | 54.1     | -22.6       | 130.7       | 0.17    |
| Airway clearance         | 6.9      | -51.6       | 65.3        | 0.82    |
| Reiff score              | -2.4     | -10.3       | 5.5         | 0.56    |

|                          |       |        |       |      |
|--------------------------|-------|--------|-------|------|
| MRC dyspnoea score       | 24.3  | -10.5  | 59.0  | 0.17 |
| Macrolide use            | 17.9  | -94.3  | 130.1 | 0.76 |
| Cardiovascular disease   | -10.5 | -77.7  | 56.6  | 0.76 |
| ABPA                     | -60.2 | -193.9 | 73.5  | 0.38 |
| Tuberculosis             | 54.7  | -39.3  | 148.7 | 0.25 |
| Post-infective aetiology | -37.1 | -135.6 | 61.4  | 0.46 |

Table S5. Linear mixed effects model estimates of FEV1 decline during the study period.

|           | COPD        | Asthma      | COPD+asthma | No airways disease |
|-----------|-------------|-------------|-------------|--------------------|
| N         | 236         | 213         | 21          | 548                |
| ICS       | 143 (60.6%) | 165 (77.5%) | 19 (90.5%)  | 295 (53.8%)        |
| LABA      | 137 (58.1%) | 151 (70.9%) | 14 (66.7%)  | 282 (51.5%)        |
| LAMA      | 61 (25.8%)  | 60 (28.2%)  | 8 (38.1%)   | 142 (25.9%)        |
| LTRA      | 63 (26.7%)  | 67 (31.5%)  | 6 (28.6%)   | 85 (15.5%)         |
| Macrolide | 8 (3.4%)    | 3 (1.4%)    | 1 (4.8%)    | 27 (4.9%)          |

Table S6. Relationship between airways disease and treatment patterns (abbreviation ICS= inhaled corticosteroid, LABA= longacting beta agonist, LAMA= long acting muscarinic antagonist, LTRA= leukotriene receptor antagonist).
